1                   **Rapid evolution of complete dosage compensation in *Poecilia***

2  
3                   David C.H. Metzger<sup>1\*</sup>, Benjamin A. Sandkam<sup>1</sup>, Iulia Darolti<sup>1</sup>, Judith E. Mank<sup>1,2</sup>

4  
5                   <sup>1</sup>Department of Zoology and Biodiversity Research Centre, University of British Columbia, Canada

6                   <sup>2</sup>Department of Genetics, Evolution and Environment, University College London, U.K.

7  
8  
9                   \* Author for Correspondence: David C.H. Metzger, Department of Zoology and Biodiversity Research  
10                  Centre, University of British Columbia, Canada, [dmetzger@zoology.ubc.ca](mailto:dmetzger@zoology.ubc.ca)

26    **ABSTRACT**

27    Dosage compensation balances gene expression between the sexes in systems with diverged  
28    heterogametic sex chromosomes. Theory predicts that dosage compensation should rapidly  
29    evolve in parallel with the divergence of sex chromosomes to prevent the deleterious effects of  
30    dosage imbalances that occur as a result of sex chromosome divergence. Examples of complete  
31    dosage compensation, where gene expression of the entire sex chromosome is compensated, are  
32    rare and have only been found in relatively ancient sex chromosome systems. Consequently,  
33    very little is known about the evolutionary dynamics of complete dosage compensation systems.  
34    We recently found the first example of complete dosage compensation in a fish, *Poecilia picta*.  
35    We also found that the Y chromosome degraded substantially in the common ancestor of *P. picta*  
36    and their close relative *Poecilia parae*. In this study we find that *P. parae* also have complete  
37    dosage compensation, thus complete dosage compensation likely evolved in the short (~3.7 my)  
38    interval after the split of the ancestor of these two species from *P. reticulata*, but before they  
39    diverged from each other. These data suggest that novel dosage compensation mechanisms can  
40    evolve rapidly, thus supporting the longstanding theoretical prediction that such mechanisms  
41    arise in parallel with rapidly diverging sex chromosomes.

42

43    **Keywords:** RNA-seq, sex chromosome, Y degeneration, *Poecilia parae*

44

45

46

47

48

## 49 **SIGNIFICANCE STATEMENT**

50 In species with XY sex chromosomes, females (XX) have as many copies of X-linked genes compared to  
51 males (XY), leading to unbalanced expression between the sexes. Theory predicts that dosage  
52 compensation mechanisms should evolve rapidly as X and Y chromosomes diverge, but examples of  
53 complete dosage compensation in recently diverged sex chromosomes are scarce, making this theory  
54 difficult to test. Across Poeciliid species the X and Y chromosomes have recently diversified. Here we  
55 find complete dosage compensation evolved rapidly as the X and Y diverged in the common ancestor of  
56 *Poecilia parae* and *P. picta*, supporting that novel dosage compensation mechanisms can evolve rapidly  
57 in tandem with diverging sex chromosomes. These data confirm longstanding theoretical predictions of  
58 sex chromosome evolution.

59

## 60 **INTRODUCTION**

61 In organisms with heterogametic sex determination, the Y chromosome diverges from the  
62 X when recombination between them is suppressed (Furman et al. 2020). The same process  
63 holds for the Z and W chromosomes, but we focus here on male heterogametic systems.  
64 Degradation of the Y chromosome can lead to pseudogenization and gene loss resulting in  
65 females (XX) having twice as many copies of genes on the sex chromosome compared to males  
66 (XY). Because genes are normally expressed equally from both copies of a chromosome, males  
67 would only have half the expression of X-linked loci (Ohno 1967; Gu & Walters 2017), leading  
68 to a dosage imbalance with expression of genes on the autosomes. To resolve this issue, many  
69 organisms have evolved mechanisms to equalize expression levels of these sex chromosome  
70 genes, known as dosage compensation (Ohno 1967). Dosage compensation mechanisms are  
71 thought to evolve rapidly in parallel with Y degradation (Ohno 1967), however, the majority of

72 sex chromosomes with dosage compensation are relatively old making it difficult to determine if  
73 dosage compensation can evolve in rapidly diverging sex chromosome systems.

74 Dosage compensation can either act by modifying expression on a gene-by-gene basis  
75 (incomplete dosage compensation) or by modifying expression along the entire chromosome  
76 (complete dosage compensation). Complete dosage compensation is predicted to arise for sex  
77 chromosomes that are rapidly diverging and experiencing extensive gene loss or  
78 pseudogenization, and has been more commonly found in male-heterogametic systems (XY)  
79 (Mullon et al. 2015; Wilson Sayres & Makova 2011). The most well characterized example for  
80 the rapid evolution of complete dosage compensation is in *Drosophila* where complete dosage  
81 compensation followed the emergence and divergence of a new XY sex chromosome system  
82 (Marín et al. 1996). The emergence of dosage compensation on neo-sex chromosomes in  
83 *Drosophila* is the result of evolution coopting extant dosage compensation mechanisms that  
84 predate the origin of the *Drosophila* genus (Marín et al. 1996). While dosage compensation can  
85 clearly evolve rapidly, it is unknown if complete dosage compensation can evolve rapidly when  
86 it is not present in close relatives.

87 Fish exhibit a high rate of sex chromosome turnover, and although there are some species  
88 with incomplete dosage compensation (eg. sticklebacks, flatfish, and rainbow trout) (White et al.  
89 2015; Shao et al. 2014; Hale et al. 2018) complete dosage compensation appears to be rare. We  
90 recently identified the first example of complete dosage compensation in a fish; *Poecilia picta*. *P.*  
91 *picta* is a close relative to the guppy (*Poecilia reticulata*) (Darolti et al. 2019) that shares the same  
92 XY system that originated 18.48-26.08 Mya (Darolti et al. 2019; Rabosky et al. 2018). In *P.*  
93 *reticulata*, the X and Y have remained largely homomorphic, with little evidence of gene loss on  
94 the Y, and no need for dosage compensation (Darolti et al. 2019). However, since their split

95 ~18.4 Mya (Rabosky et al. 2018) the *P. picta* Y has diverged substantially from the X across  
 96 nearly the entire chromosome and evolved complete dosage compensation (Darolti et al. 2019).

97 Here we take a comparative approach to narrow the timing of the evolution of complete  
 98 dosage compensation by testing for dosage compensation in *P. parae* a sister taxon to *P. picta*.  
 99 We recently characterized the sex chromosomes of *P. parae*, including five discrete Y  
 100 haplotypes that control the five male morphs of this species (Sandkam et al. 2020). Importantly  
 101 we found XY divergence across all five *P. parae* Ys was the same as XY divergence in *P. picta*,  
 102 indicating the Y diverged from the X in the ~3.7 my interval spanning the split of the *P. picta* –  
 103 *P. parae* from the common ancestor with *P. reticulata* ~18.4 mya, and prior to the split of *P.*  
 104 *picta* and *P. parae* from each other ~14.7 mya (Rabosky et al. 2018). Therefore, if *P. parae* also  
 105 has complete dosage compensation, then dosage compensation evolved rapidly after XY  
 106 chromosome divergence over a period of less than 3.7 million years (Figure 1).

107

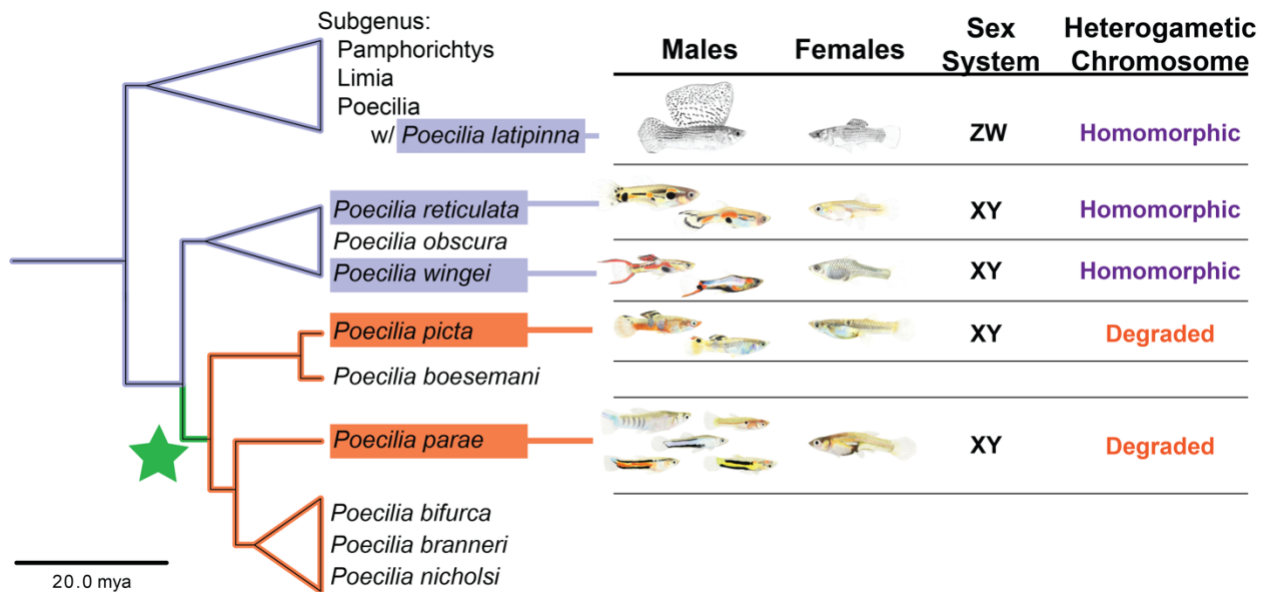

108

109

110 **Figure 1.** A phylogeny of *Poecilia* species depicting the timeframe in which dosage compensation  
111 systems observed in *P. picta* and *P. parae* evolved over the ~3.7 million year interval (denoted in green)  
112 after the common ancestor to *P. picta*-*P. parae* split from *P. reticulata*-*P. wingei* (~18.4 mya) and prior to  
113 the divergence of *P. picta* and *P. parae* from each other (~14.7 mya). The branch where sex chromosome  
114 divergence and dosage compensation evolved is indicated in green. Orange branches indicate the clade  
115 containing species where X and Y are substantially diverged and have complete dosage compensation (*P.*  
116 *picta*- Darolti et al 2019, *P. parae*- this study). Blue indicates species for which dosage compensation has  
117 been explicitly tested but found to be entirely lacking (Darolti et al 2019). Green star denotes the branch  
118 on which complete dosage compensation likely evolved. The phylogeny and divergence times are taken  
119 from The Fish Tree of Life (Rabosky et al. 2018).

120

## 121 **RESULTS**

### 122 *Characterization of dosage compensation in P. parae*

123 To test whether complete dosage compensation evolved rapidly (over ~3.7million years)  
124 in the common ancestor of *P. picta* and *P. parae*, we performed RNA-seq on muscle tissue from  
125 males and females of *P. parae*. There are five discrete Y haplotypes in *P. parae* that segregate  
126 with the five different male morphs (immaculata, yellow melanzona, blue melanzona, red  
127 melanzona, and parae morphs). Importantly, these five *P. parae* Y haplotypes emerged after X-Y  
128 recombination was halted before the split between *P. picta* and *P. parae*, ~ 18.4 Mya (Sandkam  
129 et al. 2020; Lindholm et al. 2004). Therefore, if complete dosage compensation evolved in the  
130 common ancestor of *P. picta* and *P. parae*, we would expect to see dosage compensation in all  
131 male morphs as well. To assess this, we tested for differences in expression from the X and Y  
132 chromosome in three of the five male morphs (yellow melanzona, blue melanzona, and parae,  
133 hereafter referred to as yellow, blue, and parae males). It is worth noting that all five Y

134 haplotypes show similar patterns of divergence from the X (Sandkam et al. 2020), and so the  
135 three morphs we assessed here are indicative of the species as a whole.

136         For genes that are equally expressed from both sex chromosomes we expect to see a  
137 similar proportion of transcripts expressed from each sex chromosome. To test this, we first  
138 identified heterozygous transcripts. We found that 17% of the 38,986 autosomal transcripts  
139 exhibit heterozygous expression in both males and females, and a similar proportion (12%) of  
140 the 1,349 transcripts from the sex chromosome are heterozygous in females. In contrast, only 1%  
141 of sex chromosome transcripts are heterozygous in *P. parae* males. These data suggest that  
142 widespread gene loss has occurred as a result of Y chromosome divergence in males.

143         We then compared the major allele ratios for heterozygous transcripts. Autosomal genes  
144 are equally expressed from both chromosomes in both sexes, and in X-linked genes in *P. parae*  
145 females (Figure 2A/B). However, in males we found significant allele specific expression (ASE)  
146 for sex-linked genes, consistent with the notion that for sex-linked genes that remain  
147 heterozygous in males, gene activity has been reduced from the Y paralog and expression is  
148 primarily produced from the X. This pattern was convergent across each male morph (Figure  
149 2A).

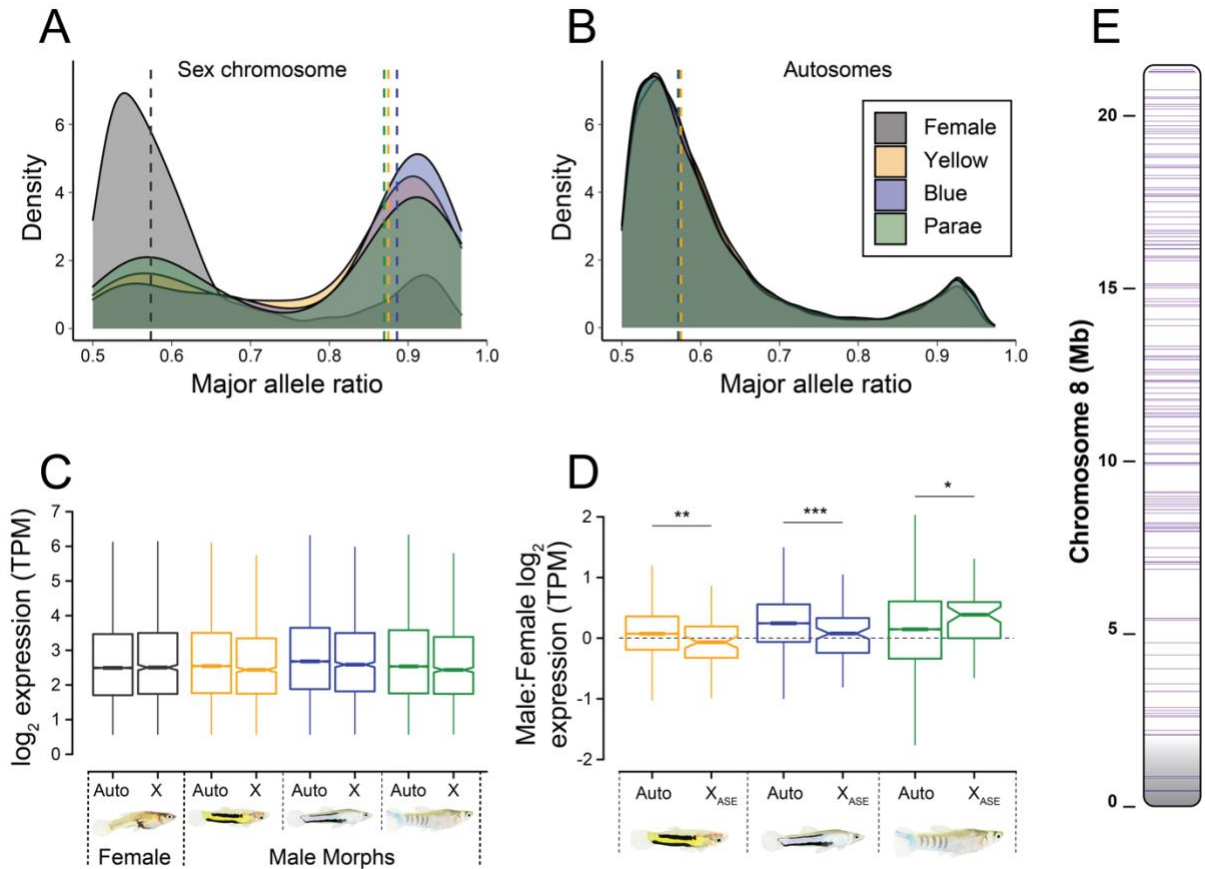

150

151

152 **Figure 2.** Patterns of allele specific expression (ASE) on the sex chromosome (A) and the autosomes (B)

153 for females and each of the three male morphs of *P. parae* indicate loss of expression for genes encoded

154 on the Y. ASE ratio of 0.5 indicates equal expression from both copies of a chromosome, while shifts

155 toward 1 indicate expression predominantly comes from just one copy. Vertical dashed lines are median

156 major allele ratio values. (C) Despite loss of expression from the Y, expression levels (log<sub>2</sub> transcripts per

157 million (TPM)) of sex chromosome genes do not differ from the autosomes for any of the male morphs.

158 (D) Male:female expression ratios for genes that exhibit allele specific expression are not different from

159 male:female expression ratios of autosomal genes, demonstrating that a loss of expression from the Y

160 chromosome in males does not result in reduced expression. The horizontal dashed line represents equal

161 expression between males and females. Colours are consistent in all panels and denote sex and/or male

162 morph. Grey = female, Yellow = yellow male morph, blue = blue male morph, green = parae male morph.



163 (E) Distribution of genes with allele specific expression (ASE) on the male X chromosome (chromosome  
164 8). ASE genes are evenly distributed along the entire chromosome, confirming complete dosage  
165 compensation for genes on the sex chromosome. Gene locations are demarcated by purple lines. The  
166 pseudo autosomal region (PAR) is in grey.

167

168 In order to determine whether Y degeneration has been coupled with X chromosome  
169 dosage compensation, we compared average expression for all genes from the X chromosome to  
170 the autosomal gene expression levels in both sexes. We found that expression of sex  
171 chromosome genes was not different from autosomal genes in any of the male morphs  
172 (Wilcoxon rank sum yellow p-value = 0.9703, blue p-value = 0.4965, parae p-value = 0.292), or  
173 between genes on the X chromosome or autosomes in females (Wilcoxon rank sum p-value =  
174 0.8336). Together this indicates complete dosage compensation arose before the morphs  
175 diverged and likely in the common ancestor of *P. picta* and *P. parae* (Figure 2C).

176 Moreover, we observe a marginal decrease in the male:female expression ratio for sex-  
177 linked genes with an ASE pattern in the yellow (p-value = 0.001) and blue (p-value = 0.0001)  
178 male morphs compared to genes on the autosomes which is consistent with the expression  
179 pattern in *P. picta* (Darolti et al., 2019). In contrast, the male:female expression ratio for sex  
180 chromosome genes with ASE in the parae male morph were significantly higher compared to the  
181 male:female ratio of autosomal genes (p-value = 0.05) (Figure 2D). These data indicate that the  
182 efficiency of the dosage compensation in *P. parae* is similar to *P. picta* and that there may be  
183 residual Y-linked expression of these genes or that dosage compensation results in a moderate  
184 overexpression of some X-linked genes in males.

185 In general, there are two ways in which complete dosage compensation has been  
186 observed in XY systems. In eutherian and marsupial mammals, one of the two X chromosomes

187 is silenced in females. Although this balances sex chromosome gene expression between males  
188 and females, it does not address expression differences between X-linked and autosomes genes.  
189 In fact, X inactivation in females means that both sexes on average express X-linked genes less  
190 than the autosomal average, and only dosage sensitive genes on the X are upregulated in both  
191 sexes to counter this (Pessia et al. 2012). Alternatively, in *Drosophila* (Marín et al. 2000), and  
192 *Anolis* (Marin et al. 2017), dosage compensation is achieved by doubling the expression of genes  
193 on the X chromosome in males.

194 We found that expression of genes on the X chromosome is not different from expression  
195 of genes on the autosomes in females, or any of the male morphs, and that the major allele ratio  
196 for X-linked genes in females is close to 0.5 indicating roughly equal expression from both  
197 copies of the X. Furthermore, ASE genes in males are distributed along the entire X chromosome  
198 providing further support for dosage compensation of the entire chromosome (Figure 2E). Taken  
199 together, these data suggest that complete dosage compensation in *P. parae* is more similar to  
200 dosage compensation in *Drosophila* and *Anolis* where genes on the X are hyper expressed in  
201 males. This provides an excellent avenue to explore the mechanisms controlling expression  
202 across entire chromosomes.

203

## 204 **DISCUSSION**

### 205 *Rapid evolution of dosage compensation*

206 Although theory suggests complete dosage compensation should evolve rapidly in  
207 tandem with Y degradation (Ohno 1967), gene expression studies in non-model systems with  
208 heteromorphic sex chromosomes have demonstrated that complete dosage compensation is  
209 actually quite rare and is not a guaranteed outcome of sex chromosome evolution (Mank et al.

210 2011). These studies show that there are many alternatives to evolving complete dosage  
211 compensation, and that complete dosage compensation is an exceptional outcome of sex  
212 chromosome evolution. Until the recent characterization of complete dosage compensation in *P.*  
213 *picta*, complete dosage compensation has been observed in a limited number of lineages, all of  
214 which are relatively ancient (Marin et al. 2017; Mullon et al. 2015). The age of these systems  
215 makes it difficult to refine estimates for the speed at which complete dosage compensation can  
216 arise.

217         Within the family Poeciliidae the subgenus *Lebistes* is particularly well suited to address  
218 this question as it contains several species with characterized sex chromosomes including *P.*  
219 *reticulata*, *P. wingei*, *P. picta*, and *P. parae* (Darolti et al. 2019). There is strong evidence that all  
220 *Lebistes* share the same sex chromosome system which originated 18.48-26.08 Mya (Darolti et  
221 al. 2019; Rabosky et al. 2018). Despite sharing the same XY system, the extent of Y degradation  
222 differs dramatically, from largely intact in *P. reticulata* and *P. wingei* to highly degraded in *P.*  
223 *picta* and *P. parae* (Darolti et al. 2019; Sandkam et al. 2020). Without gene loss, there would be  
224 no selective pressure to evolve dosage compensation, thus it is not surprising that a dosage  
225 compensation was not found in either *P. reticulata* and *P. wingei* (Darolti et al. 2019), where  
226 there is little evidence of decreased gene activity from the Y chromosome.

227         In contrast, the Y chromosomes in *P. picta* and *P. parae* exhibit substantial divergence  
228 along the entire chromosome (Sandkam et al. 2020; Darolti et al. 2019). Here we present  
229 evidence for complete dosage compensation common in multiple morphs of *P. parae*. These data  
230 suggest that the dosage compensation system in *P. parae* is shared with *P. picta* and evolved  
231 over a period of less than 4 million years in their common ancestor.

232 In some systems, the rapid evolution of complete dosage compensation is achieved by  
233 recruiting an ancestral or pre-existing dosage compensation mechanism (Marín et al. 1996;  
234 Marin et al. 2017). In fishes, complete dosage compensation is rare, which may be the result of  
235 frequent sex chromosome turnover and a paucity of heteromorphic sex chromosomes that makes  
236 complete dosage compensation unnecessary. As such dosage compensation in fish is frequently  
237 accomplished on a gene-by-gene basis and remains overall incomplete (Shao et al. 2014; White  
238 et al. 2015; Darolti et al. 2019) with the exception of *P. picta* (Darolti et al. 2019) and *P. parae*.  
239 Further work elucidating the mechanism of X chromosome dosage compensation *P. picta* and *P.*  
240 *parae* will provide novel insights in the evolution of dosage compensation mechanisms.

241

## 242 **METHODS**

### 243 *RNA isolation and sequencing*

244 Animals used in this study were collected in Spring 2019 from natural populations in Suriname  
245 and brought to the University of British Columbia (Vancouver, BC, Canada) aquatics facility,  
246 where they were kept in 20L glass aquaria on a 12:12 day:night cycle at 26°C and 6ppt salinity  
247 (Instant Ocean Sea Salt) and fed Hikari Fancy Guppy pellets and live brine shrimp daily.  
248 Individuals were euthanized using a lethal overdose of MS-222 and muscular tail tissue was  
249 taken from the anal pore to the base of the pectoral fin. RNA was immediately isolated using  
250 RNeasy spin columns with on-column DNase treatment (Qiagen) following the manufacturer's  
251 recommended protocol. Library preparation and 100bp paired-end sequencing was performed on  
252 an Illumina NovaSeq 6000 at McGill University and the Génome Québec Innovation Centre.  
253 Adaptor sequences were removed and reads were quality filtered and trimmed using  
254 trimmomatic (v0.36) using a sliding window of 4 bases and a minimum Phred score of 15. Reads

255 with leading and trailing bases with a Phred score <3 were also removed. Sequencing libraries  
256 consisted of ~88 million reads.

257

### 258 *Transcript Alignment and Filtering*

259 Reads were aligned to a previously published female *P. parae* genome assembly (Sandkam et al.  
260 2020) using the two-pass method for STAR align (v2.7.2) (Dobin et al. 2013). Alignments were  
261 sorted by coordinate and converted to BAM format using SAMtools (v1.9). To find the full list  
262 of non-redundant *P. parae* transcripts we generated GTF files for each individual using StringTie  
263 (v1.3.6) then merged all GTF files. To remove non-coding RNA (ncRNA) we first compiled a  
264 database of all ncRNAs in reference genomes of close relatives on Ensemble: *Poecilia formosa*  
265 (PoeFor\_5.1.2), *Oryzias latipes* (ASM223467v1), *Gasterosteus aculeatus* (BROAD S1), and  
266 *Danio rerio* (GRCz11). We then removed all *P. parae* transcripts that BLASTed to our ncRNA  
267 database.

268

### 269 *Allele Specific Expression*

270 To ensure our results are comparable to our previous results in *P. picta* we followed the same  
271 pipeline to identify allele specific expression (Darolti et al. 2019). In short, for each sex and  
272 morph we identified SNPs separately using SAMtools mpileup (v1.9) and varscan (v2.4.3) with  
273 parameters --min-coverage 2, --min-ave-qual 20, --min-freq-for-hom 0.90, and excluding  
274 triallelic SNPs. We then filtered SNPs for a minimum site coverage of 15 to account for  
275 sequencing errors, and used a variable coverage filter to account for potential effects of  
276 sequencing errors due to variable coverage levels (an error rate of 1 in 100 and a maximum  
277 coverage for a given site of 100,000) (Quinn et al. 2014). We then removed SNP clusters of more

278 than five SNPs in 100bp window to limit potential biases from read assignments to a single  
279 reference sequence (Stevenson et al. 2013).

280

### 281 *Expression Level*

282 We extracted read counts using the featureCounts from the subread package (Liao et al. 2014)  
283 and the ncRNA filtered GTF file described above. Reads with low expression (less than 10% of  
284 the mean) were removed from the dataset. We then used a Wilcoxon rank sum test to compare  
285 expression levels between groups using the wilcox.test() function in R ( $p < 0.05$ ).

286

## 287 **DATA AVAILABILITY**

288 Illumina .fastq read files will be made publicly available on the Genbank sequence read archive  
289 upon publication of this manuscript.

290

## 291 **ACKNOWLEDGEMENTS**

292 This work was supported by the Canada 150 Research Chair Program and the European  
293 Research Council (680951) to JEM. and a Banting Postdoctoral Fellowship to BAS (Natural  
294 Science and Engineering Research Council of Canada). We thank Clara Lacy for guppy  
295 illustrations and all members of the Mank lab for helpful comments and suggestions.

296

297

298

299

300

## 301 REFERENCES

- 302 Darolti I et al. 2019. Extreme heterogeneity in sex chromosome differentiation and dosage  
303 compensation in livebearers. *Proceedings of the National Academy of Sciences*. 116:19031–  
304 19036. doi: 10.1073/pnas.1905298116.
- 305
- 306 Dobin A et al. 2013. STAR: Ultrafast universal RNA-seq aligner. *Bioinformatics*. 29:15–21. doi:  
307 10.1093/bioinformatics/bts635.
- 308
- 309 Furman BLS et al. 2020. Sex chromosome evolution: so many exceptions to the rules. *Genome*  
310 *Biology and Evolution*. 12:750–763. doi: 10.1093/gbe/evaa081.
- 311
- 312 Gu L, Walters JR. 2017. Evolution of sex chromosome dosage compensation in animals: A  
313 beautiful theory, undermined by facts and bedeviled by details. *Genome Biology and Evolution*.  
314 9:2461–2476. doi: 10.1093/gbe/evx154.
- 315
- 316 Hale MC, McKinney GJ, Thrower FP, Nichols KM. 2018. Evidence of sex-bias in gene  
317 expression in the brain transcriptome of two populations of rainbow trout (*Oncorhynchus*  
318 *mykiss*) with divergent life histories. *PLoS ONE*. 13:1–18. doi: 10.1371/journal.pone.0193009.
- 319
- 320 Liao Y, Smyth GK, Shi W. 2014. FeatureCounts: An efficient general purpose program for  
321 assigning sequence reads to genomic features. *Bioinformatics*. 30:923–930. doi:  
322 10.1093/bioinformatics/btt656.
- 323
- 324 Lindholm AK, Brooks R, Breden F. 2004. Extreme polymorphism in a Y-linked sexually  
325 selected trait. *Heredity*. 92:156–162. doi: 10.1038/sj.hdy.6800386.
- 326
- 327 Mank JE, Hosken DJ, Wedell N. 2011. Some inconvenient truths about sex chromosome dosage  
328 compensation and the potential role of sexual conflict. *Evolution*. 65:2133–2144. doi:  
329 10.1111/j.1558-5646.2011.01316.x.
- 330
- 331 Marín I, Franke A, Bashaw GJ, Baker BS. 1996. The dosage compensation system of *Drosophila*  
332 is co-opted by newly evolved X chromosomes. *Nature*. 383:160–163. doi: 10.1038/383160a0.
- 333
- 334 Marín I, Siegal ML, Baker BS. 2000. The evolution of dosage-compensation mechanisms.  
335 *BioEssays*. 22:1106–1114. doi: 10.1002/1521-1878(200012)22:12<1106::AID-  
336 BIES8>3.0.CO;2-W.
- 337
- 338 Marin R et al. 2017. Convergent origination of a *Drosophila*-like dosage compensation  
339 mechanism in a reptile lineage. *Genome Research*. 27:1974–1987. doi: 10.1101/gr.223727.117.

340  
341 Mullon C, Wright AE, Reuter M, Pomiankowski A, Mank JE. 2015. Evolution of dosage  
342 compensation under sexual selection differs between X and Z chromosomes. *Nature*  
343 *Communications*. 6:1–10. doi: 10.1038/ncomms8720.  
344  
345 Ohno S. 1967. *Sex chromosomes and sex-linked genes*. Springer-Verlag: New York.  
346  
347 Pessia E, Makino T, Bailly-Bechet M, McLysaght A, Marais GAB. 2012. Mammalian X  
348 chromosome inactivation evolved as a dosage-compensation mechanism for dosage-sensitive  
349 genes on the X chromosome. *Proceedings of the National Academy of Sciences of the United*  
350 *States of America*. 109:5346–5351. doi: 10.1073/pnas.1116763109.  
351  
352 Quinn A, Juneja P, Jiggins FM. 2014. Estimates of allele-specific expression in *Drosophila* with  
353 a single genome sequence and RNA-seq data. *Bioinformatics*. 30:2603–2610. doi:  
354 10.1093/bioinformatics/btu342.  
355  
356 Rabosky DL et al. 2018. An inverse latitudinal gradient in speciation rate for marine fishes.  
357 *Nature*. 559:392–395. doi: 10.1038/s41586-018-0273-1.  
358  
359 Sandkam BA et al. 2020. Extreme Y chromosome polymorphism corresponds to five male  
360 reproductive morphs. *bioRxiv*. doi: 10.1101/2020.08.19.258434.  
361  
362 Shao C et al. 2014. Epigenetic modification and inheritance in sexual reversal of fish. *Genome*  
363 *Research*. 24:604–615. doi: 10.1101/gr.162172.113.  
364  
365 Stevenson KR, Coolon JD, Wittkopp PJ. 2013. Sources of bias in measures of allele-specific  
366 expression derived from RNA-seq data aligned to a single reference genome. *BMC Genomics*.  
367 14. doi: 10.1186/1471-2164-14-536.  
368  
369 White MA, Kitano J, Peichel CL. 2015. Purifying selection maintains dosage-sensitive genes  
370 during degeneration of the threespine stickleback Y chromosome. *Molecular Biology and*  
371 *Evolution*. 32:1981–1995. doi: 10.1093/molbev/msv078.  
372  
373 Wilson Sayres MA, Makova KD. 2011. Genome analyses substantiate male mutation bias in  
374 many species. *BioEssays*. 33:938–945. doi: 10.1002/bies.201100091.  
375  
376
